# Supplementary material for: Structural transformations of the La2−xPrxNiO4+δ system probed by high-resolution synchrotron and neutron powder diffraction
Source: Royal Society of Chemistry journal article supplement (doi:10.1039/c8dt03524e), 2018-11-29
Supplement: c8dt03524e1.pdf [file c8dt03524e1.pdf]

## Supplemental Information

### Structural transformations of the $\text{La}_{2-x}\text{Pr}_x\text{NiO}_{4+\delta}$ system probed by high-resolution synchrotron and neutron powder diffraction

Vaibhav Vibhu <sup>a,b</sup>, Matthew R. Suchomel <sup>†a,b</sup>, Nicolas Penin <sup>a,b</sup>, François Weill <sup>a,b</sup>, Jean-Claude Grenier <sup>a,b</sup>, Jean-Marc Bassat <sup>a,b</sup>, and Aline Rougier <sup>a,b</sup>

<sup>a</sup>. CNRS, ICMCB, UMR 5026, F-33600 Pessac, France

<sup>b</sup>. Univ. Bordeaux, ICMCB, UMR 5026, F-33600 Pessac, France

<sup>†</sup> Corresponding author

Transformation from  
 expanded  $F2/m$  monoclinic cell to  
 standard  $C2/m$  monoclinic cell  
 (Space Group #12, Setting:  $C 1 2/m 1$ )

$$\begin{matrix} F2/m \\ \begin{bmatrix} a \\ b \\ c \end{bmatrix} \end{matrix} \rightarrow \begin{matrix} C2/m \\ \begin{bmatrix} a' \\ b' \\ c' \end{bmatrix} \end{matrix} = \begin{bmatrix} -1 & 0 & 0 \\ 0 & 0 & 1 \\ 1/2 & 1/2 & 0 \end{bmatrix}$$

Transformation for  $\text{Pr}_2\text{NiO}_{4.25}$

| $F2/m$                     | $\rightarrow$ | $C2/m$                            |
|----------------------------|---------------|-----------------------------------|
| $a = 5.3917 \text{ \AA}$   |               | $a' = 5.3917 \text{ \AA}$         |
| $b = 5.4574 \text{ \AA}$   |               | $b' = 12.4478 \text{ \AA}$        |
| $c = 12.4478 \text{ \AA}$  |               | $c' = 3.8335 \text{ \AA}$         |
| $\gamma = 90.07^\circ$     |               | $\beta' = 134.62^\circ$           |
| $V = 366.27 \text{ \AA}^3$ |               | $V' = V/2 = 183.13 \text{ \AA}^3$ |
| Pr @ (0, 0, 0.36)          |               | Pr @ (0, 0.36, 0)                 |
| Ni @ (0, 0, 0)             |               | Ni @ (0, 0, 0)                    |
| O1 @ (0, 0, 0.17)          |               | O1 @ (0, 0.17, 0)                 |
| O2 @ (1/4, 1/4, 0)         |               | O2 @ (0, 0, 1/2)                  |
| O3 @ (3/4, 1/4, 0)         |               | O3 @ (1/2, 0, 1/2)                |
| O4 @ (1/4, 1/4, 1/4)       |               | O4 @ (0, 1/4, 1/2)                |

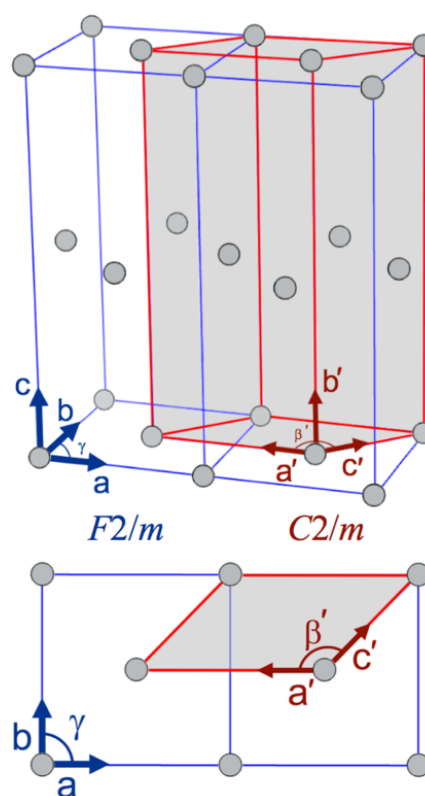

**Supplemental Figure S1:** Relationship between expanded  $F2/m$  monoclinic unit cell (full name  $F112/m$  with unique axis  $c$ ) used in this work and its equivalent reduced conventional  $C2/m$  cell in its standard crystallographic setting (full name  $C12/m1$  with unique axis  $b$ ). On the left, the transformation matrix is given, and corresponding lattice values and atomic positions are given for the  $\text{Pr}_2\text{NiO}_{4.25}$  composition. On the right, a schematic diagram of the relationship between the  $F2/m$  cell (in blue) and  $C2/m$  cell (in red) is shown. For clarity, only the Ni atom is plotted in the unit cell.

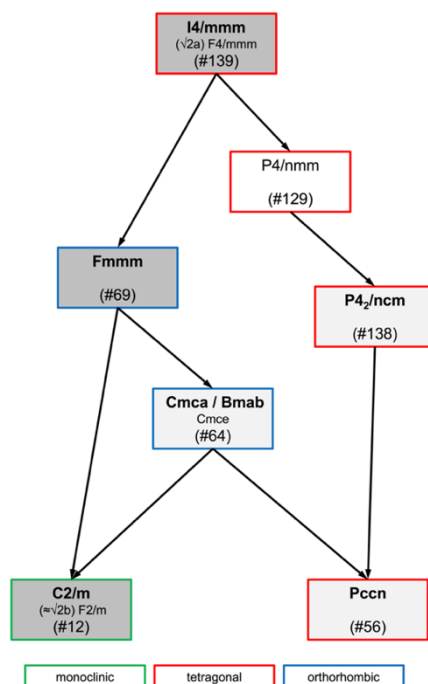

**Supplemental Figure S2:** Selected group/subgroup relationship paths between different space groups commonly referenced in the  $\text{La}_2\text{NiO}_{4+x}$  and  $\text{Pr}_2\text{NiO}_{4+x}$  literature; from the Bilbao Crystallographic Server<sup>52</sup>. Shaded space groups are reported for the LPNO system in the current study.

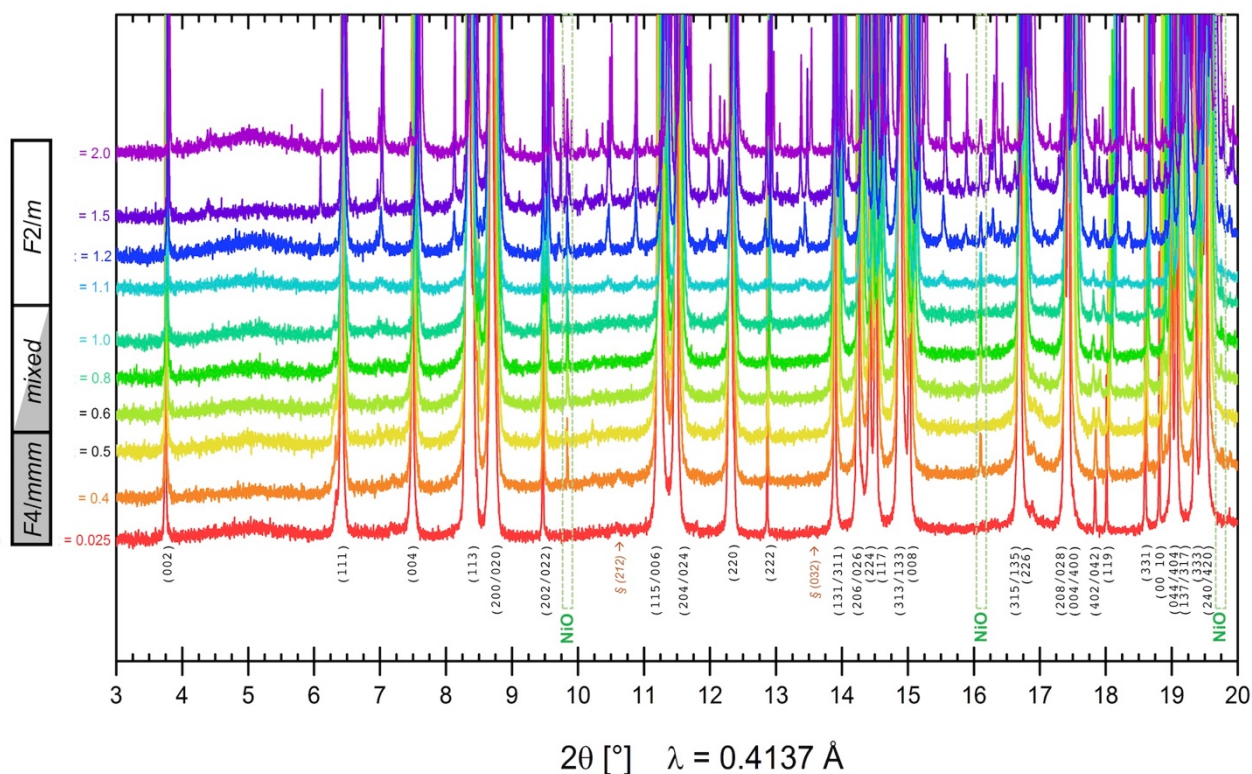

**Supplemental Figure S3:** Near background intensity zoomed view of HR-SPD data (295 K) for  $\text{La}_{2-x}\text{Pr}_x\text{NiO}_{4+x}$  series. Assigned space groups in this study are marked on the left near the composition ( $x$ ). Numerous weak intensity non-indexed peaks are clear for compositions with  $x > 1.0$ . Main peaks are labeled with  $hkl$  indexing for a generic  $F$ -centered orthorhombic cell ( $hkl$  condition; all even or all odd). Characteristic positions of (212) and (032) superlattice reflections allowed in  $Bmab$  and  $P4_2/ncm$  space groups that arise from ordered in-plane tilting of  $\text{NiO}_6$  octahedra are marked by §. NiO impurity peaks (cubic  $Fm\bar{3}m$  cell with  $a = 4.176 \text{ \AA}$ ) are marked.

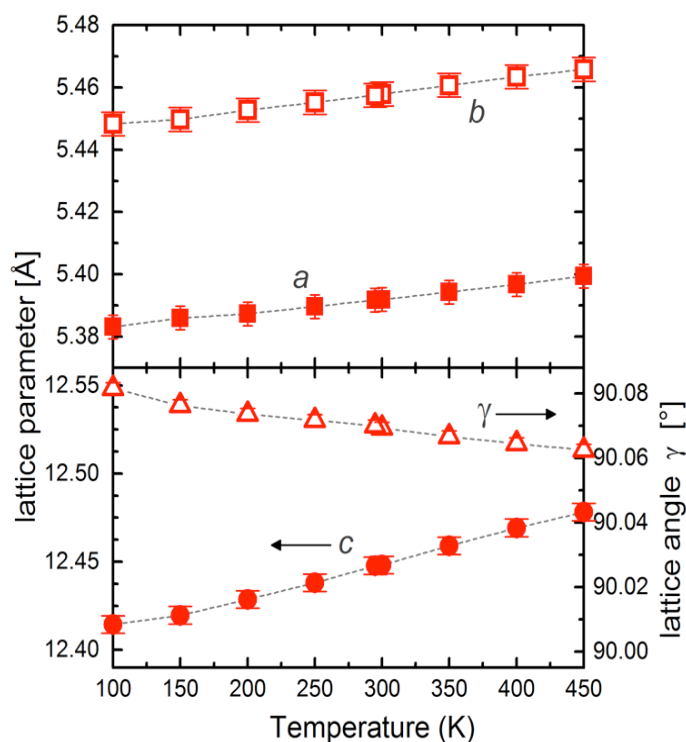

**Supplemental Figure S4:** Evolution of refined lattice parameters ( $a$ ,  $b$ ,  $c$ ,  $\gamma$ ) as a function of temperature for  $\text{Pr}_2\text{NiO}_{4.25}$ . Lattice values were obtained from refinements of *in-situ* variable temperature HR-SPD data using the  $F2/m$  monoclinic unit cell.

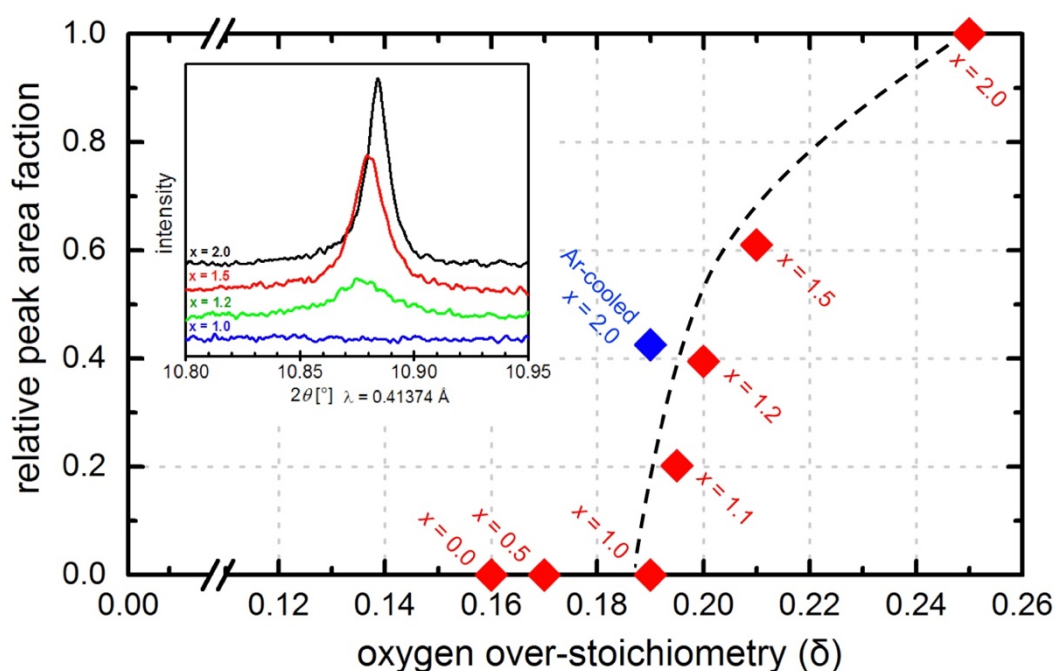

**Supplemental Figure S5:** Evolution of the relative integrated peak area fraction observed in HR-SPD data at room temperature as a function of oxygen over-stoichiometry ( $\delta$ ) for Pr-rich  $\text{La}_{2-x}\text{Pr}_x\text{NiO}_{4+\delta}$  compositions. The small inset upper figure inset plots the evolution of the reference non-indexed weak intensity peak (at  $2\theta \approx 10.88^\circ$ ) for select air-cooled compositions. The integrated peak area was defined as 1.0 for  $\delta = 0.25$ , and normalized for each scan as a fraction of the integrated area for a  $F2/m$  indexed (004) peak at  $2\theta \approx 7.60^\circ$ . Red plotted diamonds show air-cooled samples; the blue diamond represents the Ar-cooled  $x = 2.0$  sample with reduced  $\delta$ . The dashed black curve is a guide for the eye. See main text Section 4.4 for details and discussion.

**Supplemental Table S1:** Summary of Rietveld refined structural parameters and fit statistics for compositions ( $x$ ) in the  $\text{La}_{2-x}\text{Pr}_x\text{NiO}_{4+6}$  system. Refined values are followed by the uncertainty in brackets. The lack of an uncertainty value indicates a fixed non-refined parameter. Other symbols described in footnotes below.

| Composition ( $x$ )                              | region of 2-phase coexistence |                                     |                                    |                                    |                |                                    |                |                                    |                |                                    |                |                                    |                                    |                                    |                   | 2.0 (Ar cooled)   |
|--------------------------------------------------|-------------------------------|-------------------------------------|------------------------------------|------------------------------------|----------------|------------------------------------|----------------|------------------------------------|----------------|------------------------------------|----------------|------------------------------------|------------------------------------|------------------------------------|-------------------|-------------------|
|                                                  | 0.0                           | 0.25                                | 0.4                                | 0.5                                |                | 0.6                                |                | 0.8                                |                | 1.0                                |                | 1.1                                | 1.2                                | 1.5                                | 2.0               |                   |
| Space Group †                                    | $Fm\bar{3}m$                  | $F4/m\bar{3}m$                      | $F4/m\bar{3}m$                     | $F2/m$                             | $F4/m\bar{3}m$ | $F2/m$                             | $F4/m\bar{3}m$ | $F2/m$                             | $F4/m\bar{3}m$ | $F2/m$                             | $F4/m\bar{3}m$ | $F2/m$                             | $F2/m$                             | $F2/m$                             | $F2/m$            | $F2/m$            |
| weight fraction ▲                                | --                            | --                                  | --                                 | 0.66                               | 0.34           | 0.76                               | 0.24           | 0.84                               | 0.16           | 0.92                               | 0.08           | --                                 | --                                 | --                                 | --                | --                |
| $a$ (Å)                                          | 5.45985(1)                    | 5.45992(1)                          | 5.45700(1)                         | 5.44209(2)                         | 5.45492(2)     | 5.43737(2)                         | 5.45279(3)     | 5.42874(1)                         | 5.44904(2)     | 5.42111(1)                         | 5.44482(2)     | 5.41771(1)                         | 5.41440(1)                         | 5.40572(1)                         | 5.39172(1)        | 5.39757(1)        |
| $b$ (Å)                                          | 5.46471(1)                    | = $a$                               | = $a$                              | 5.46796(2)                         | = $a$          | 5.46892(2)                         | = $a$          | 5.46962(1)                         | = $a$          | 5.46904(1)                         | = $a$          | 5.46865(1)                         | 5.46809(1)                         | 5.46422(1)                         | 5.45749(1)        | 5.45416(1)        |
| $c$ (Å)                                          | 12.6862(2)                    | 12.6582(1)                          | 12.6414(1)                         | 12.6396(3)                         | 12.6315(2)     | 12.6195(2)                         | 12.6207(1)     | 12.5939(1)                         | 12.5952(1)     | 12.5706(2)                         | 12.5702(1)     | 12.5572(2)                         | 12.5443(1)                         | 12.5091(1)                         | 12.4478(1)        | 12.4386(2)        |
| $g$ (°)                                          | 90                            | 90                                  | 90                                 | 90.003(1)                          | 90             | 90.003(2)                          | 90             | 90.005(2)                          | 90             | 90.010(2)                          | 90             | 90.011(2)                          | 90.026(2)                          | 90.047(2)                          | 90.070(2)         | 90.062(2)         |
| Vol. (Å <sup>3</sup> ), $Z = 4$                  | 378.510(1)                    | 377.351(1)                          | 376.447(1)                         | 375.888(1)                         | 375.867(2)     | 375.259(1)                         | 375.251(4)     | 373.994(1)                         | 373.976(3)     | 372.695(1)                         | 372.656(1)     | 372.036(1)                         | 371.391(1)                         | 369.495(1)                         | 366.278(1)        | 366.181(1)        |
| Pr/La (0, 0, $z$ )                               | 0.36064                       | 0.36046(1)                          | 0.36040(1)                         | 0.36042(4)                         | 0.36020(5)     | 0.36025(3)                         | 0.36036(9)     | 0.36024(3)                         | 0.35946(9)     | 0.36017(2)                         | 0.3584(2)      | 0.35993(2)                         | 0.35994(2)                         | 0.35960(2)                         | 0.35910(2)        | 0.35958(2)        |
| fixed occupancy                                  | $\text{La}_{1.0}$             | $\text{Pr}_{0.125}\text{La}_{0.87}$ | $\text{Pr}_{0.20}\text{La}_{0.80}$ | $\text{Pr}_{0.25}\text{La}_{0.75}$ |                | $\text{Pr}_{0.30}\text{La}_{0.70}$ |                | $\text{Pr}_{0.40}\text{La}_{0.60}$ |                | $\text{Pr}_{0.50}\text{La}_{0.50}$ |                | $\text{Pr}_{0.55}\text{La}_{0.45}$ | $\text{Pr}_{0.60}\text{La}_{0.40}$ | $\text{Pr}_{0.75}\text{La}_{0.25}$ | $\text{Pr}_{1.0}$ | $\text{Pr}_{1.0}$ |
| $U_{\text{iso}} \times 100$ (Å <sup>2</sup> )    | 0.75(1)                       | 0.88(1)                             | 0.91(1)                            | 0.88(1)                            |                | 0.82(1)                            |                | 0.84(1)                            |                | 0.85(1)                            |                | 0.82*                              | 0.91*                              | 0.96*                              | 0.95*             | 1.02(1)           |
| Ni (0, 0, 0)                                     |                               |                                     |                                    |                                    |                |                                    |                |                                    |                |                                    |                |                                    |                                    |                                    |                   |                   |
| $U_{\text{iso}} \times 100$ (Å <sup>2</sup> )    | 0.32(1)                       | 0.46(1)                             | 0.48(1)                            | 0.47(2)                            |                | 0.52(2)                            |                | 0.41(2)                            |                | 0.41(1)                            |                | 0.52*                              | 0.59*                              | 0.54*                              | 0.55*             | 0.46(1)           |
| O(1) (0, 0, $z$ )                                | 0.1722(2)                     | 0.1729(1)                           | 0.1727(2)                          | 0.1732(2)                          |                | 0.1734(1)                          |                | 0.1741(2)                          |                | 0.1741(2)                          |                | 0.1740(3)                          | 0.1733(1)                          | 0.1730(1)                          | 0.1731(1)         | 0.1743(2)         |
| $U_{\text{iso}} \times 100$ (Å <sup>2</sup> )    | 2.94(2)                       | 2.9*                                | 3.18*                              | 4.1(2)                             | 2.2(2)         | 4.78*                              | 2.29*          | 3.8(1)                             | 1.5(1)         | 4.65*                              | 2.2(3)         | 5.00*                              | 5.02*                              | 5.29*                              | 6.16*             | 3.96(6)           |
| O(2) ( $\frac{1}{4}, \frac{1}{4}, 0$ )           |                               |                                     |                                    |                                    |                |                                    |                |                                    |                |                                    |                |                                    |                                    |                                    |                   |                   |
| $U_{\text{iso}} \times 100$ (Å <sup>2</sup> )    | 1.06(2)                       | 0.86(4)                             | 0.96(4)                            | 1.17(5)                            |                | 1.15(2)                            |                | 0.93(5)                            |                | 0.95(5)                            |                | 0.96(6)                            | 1.51*                              | 1.45*                              | 1.73*             | 1.51(6)           |
| O(3) ( $\frac{3}{4}, \frac{1}{4}, 0$ )           |                               |                                     |                                    |                                    |                |                                    |                |                                    |                |                                    |                |                                    |                                    |                                    |                   |                   |
| $U_{\text{iso}} \times 100$ (Å <sup>2</sup> )    | --                            | --                                  | --                                 | 1.17(5)                            | --             | 1.15(2)                            | --             | 0.93(5)                            | --             | 0.95(5)                            | --             | 0.96(6)                            | 1.66*                              | 1.75*                              | 1.76*             | 1.43(8)           |
| O(4) ( $\frac{1}{4}, \frac{1}{4}, \frac{1}{4}$ ) |                               |                                     |                                    |                                    |                |                                    |                |                                    |                |                                    |                |                                    |                                    |                                    |                   |                   |
| $U_{\text{iso}} \times 100$ (Å <sup>2</sup> )    | 1.06(2)                       | 0.86(4)                             | 0.96(4)                            | 1.17(5)                            |                | 1.15(2)                            |                | 0.93(5)                            |                | 0.95(5)                            |                | 1.5(3)                             | 2.9(3)                             | 2.9(3)                             | 2.59(3)           | 2.6(1)            |
| occupancy                                        | 0.08                          | 0.08                                | 0.08                               | 0.06(3)                            |                | 0.08(2)                            |                | 0.09(2)                            |                | 0.09(2)                            |                | 0.10(1)                            | 0.11(1)                            | 0.11(1)                            | 0.12(1)           | 0.08(1)           |
| oxygen $\delta$ estimate §                       | 0.16                          | 0.16                                | 0.16                               | 0.17                               |                | 0.17                               |                | 0.18                               |                | 0.19                               |                | 0.20                               | 0.20                               | 0.21                               | 0.25              | 0.19              |
| $\delta$ (diffraction)                           | 0.16                          | 0.16                                | 0.16                               | 0.13(5)                            |                | 0.16(3)                            |                | 0.18(3)                            |                | 0.18(3)                            |                | 0.20(2)                            | 0.20(2)                            | 0.22(2)                            | 0.24(2)           | 0.17(2)           |
| $\delta$ (TGA)                                   | 0.16                          | --                                  | --                                 | 0.17                               |                | --                                 |                | --                                 |                | 0.19                               |                | --                                 | --                                 | 0.21                               | 0.25              | 0.19              |
| refined data sets ♦                              | SPD                           | SPD                                 | SPD                                | SPD                                |                | SPD+NPD                            |                | SPD                                |                | SPD                                |                | SPD                                | SPD+NPD                            | SPD+NPD                            | SPD+NPD           | SPD               |
| SPD $R_{\text{wp}}$                              | 9.68%                         | 11.44%                              | 10.73%                             | 12.91%                             |                | 13.62%                             |                | 13.21%                             |                | 13.87%                             |                | 15.61%                             | 13.46%                             | 12.1%                              | 12.8%             | 10.6%             |
| SPD+NPD $R_{\text{wp}}$                          | --                            | --                                  | --                                 | --                                 |                | 11.85%                             |                | --                                 |                | --                                 |                | --                                 | 10.97%                             | 10.6%                              | 10.4%             | --                |
| Total Reduced $\chi^2$                           | 4.32                          | 6.40                                | 7.18                               | 11.69                              |                | 16.88                              |                | 11.97                              |                | 13.72                              |                | 8.95                               | 13.97                              | 12.79                              | 10.01             | 6.49              |

## Footnotes

†  $F2/m$  (full name  $F112/m$ ) is a non-standard setting of  $C2/m$  (no 12);  $F4/m\bar{3}m$  is a non-standard  $I4/m\bar{3}m$  setting (no 139)

▲ refined phase weight fractions for 2-phase compositions

§ estimated oxygen  $\delta$  values reported in Table 1; determined (primarily) from TGA data or from (secondarily) diffraction data structural refinements

\*  $U_{\text{iso}}$  equivalent for refined  $U_{\text{anis}}$  values (see supplemental information)

♦ Synchrotron Powder Diffraction (SPD), Neutron Powder Diffraction (NPD)

**Supplemental Table S2:** Summary of Rietveld refined anisotropic displacement parameter (ADP) values ( $U_{aniso}$ ) for selected Pr-rich compositions ( $x$ ) in the  $\text{La}_{2-x}\text{Pr}_x\text{NiO}_{4+\delta}$  system.

| Composition ( $x$ )                              | 1.1      | 1.2      | 1.5       | 2.0       |
|--------------------------------------------------|----------|----------|-----------|-----------|
| Space Group                                      | $F2/m$   | $F2/m$   | $F2/m$    | $F2/m$    |
| refined data sets                                | SPD      | SPD+NPD  | SPD+NPD   | SPD+NPD   |
| Pr/La: $U_{aniso} \times 100$ ( $\text{\AA}^2$ ) |          |          |           |           |
| U11                                              | 0.69(1)  | 0.77(1)  | 0.85(1)   | 0.84(1)   |
| U22                                              | 0.99(1)  | 1.19(1)  | 1.26(1)   | 1.34(1)   |
| U33                                              | 0.74(1)  | 0.76(1)  | 0.75(1)   | 0.67(1)   |
| U12                                              | -0.18(4) | -0.14(1) | -0.22(1)  | -0.24(1)  |
| Ni: $U_{aniso} \times 100$ ( $\text{\AA}^2$ )    |          |          |           |           |
| U11                                              | 0.23(4)  | 0.37(2)  | 0.26(2)   | 0.22(2)   |
| U22                                              | 0.16(4)  | 0.32(3)  | 0.30(2)   | 0.25(2)   |
| U33                                              | 0.92(4)  | 1.07(2)  | 1.05(2)   | 1.17(3)   |
| U12                                              | -0.2(1)  | -0.25(3) | 0.18(3)   | -1.10(3)  |
| O(1): $U_{aniso} \times 100$ ( $\text{\AA}^2$ )  |          |          |           |           |
| U11                                              | 4.9(3)   | 5.30(8)  | 5.23(8)   | 5.91(8)   |
| U22                                              | 9.9(4)   | 9.15(12) | 10.06(12) | 11.90(12) |
| U33                                              | 0.1(2)   | 0.61(5)  | 0.59(5)   | 0.69(5)   |
| U12                                              | 6.4(4)   | 6.02(11) | 5.30(12)  | 5.41(13)  |
| O(2): $U_{aniso} \times 100$ ( $\text{\AA}^2$ )  |          |          |           |           |
| U11                                              | --       | 0.90(11) | 0.71(14)  | 0.82(11)  |
| U22                                              | --       | 0.31(13) | 0.27(14)  | 0.33(11)  |
| U33                                              | --       | 3.63(30) | 3.36(31)  | 4.14(29)  |
| U12                                              | --       | -0.40(8) | -0.27(8)  | -0.25(7)  |
| O(3): $U_{aniso} \times 100$ ( $\text{\AA}^2$ )  |          |          |           |           |
| U11                                              | --       | 0.39(10) | 0.34(13)  | 0.26(10)  |
| U22                                              | --       | 0.95(12) | 0.57(15)  | 0.53(11)  |
| U33                                              | --       | 3.64(33) | 4.34(35)  | 4.38(30)  |
| U12                                              | --       | 0.18(7)  | 0.21(8)   | 0.21(6)   |

**Supplemental Table S3:** Summary of selected bond distances determined from Rietveld refined structural models for compositions ( $x$ ) in the  $\text{La}_{2-x}\text{Pr}_x\text{NiO}_{4+\delta}$  system.

| Composition ( $x$ )   | region of 2-phase coexistence |                |                |           |                |           |                |           |                |            |                |           |           |           | 2.0 (Ar cooled) |           |
|-----------------------|-------------------------------|----------------|----------------|-----------|----------------|-----------|----------------|-----------|----------------|------------|----------------|-----------|-----------|-----------|-----------------|-----------|
|                       | 0.0                           | 0.25           | 0.4            | 0.5       | 0.6            | 0.8       | 1.0            | 1.1       | 1.2            | 1.5        | 2.0            |           |           |           |                 |           |
| Space Group           | $Fm\bar{3}m$                  | $F4/m\bar{3}m$ | $F4/m\bar{3}m$ | $F2/m$    | $F4/m\bar{3}m$ | $F2/m$    | $F4/m\bar{3}m$ | $F2/m$    | $F4/m\bar{3}m$ | $F2/m$     | $F4/m\bar{3}m$ | $F2/m$    | $F2/m$    | $F2/m$    | $F2/m$          | $F2/m$    |
| refined data sets     | SPD                           | SPD            | SPD            | SPD       |                | SPD+NPD   |                | SPD       |                | SPD        |                | SPD       | SPD+NPD   | SPD+NPD   | SPD+NPD         | SPD       |
| Ni-O(1) (x2)          | 2.198(2)                      | 2.188(2)       | 2.183(2)       | 2.188(3)  | 2.188(3)       | 2.188(2)  | 2.1878(2)      | 2.193(3)  | 2.193(3)       | 2.1886(2)  | 2.189(2)       | 2.185(3)  | 2.173(1)  | 2.164(1)  | 2.155(1)        | 2.168(3)  |
| Ni-O(2) (x2, x4) †    | 1.9312(2)                     | 1.9304(2)      | 1.9293(2)      | 1.9286(1) | 1.9286(1)      | 1.9278(1) | 1.9282(1)      | 1.9265(1) | 1.9265(1)      | 1.9249(1)  | 1.9250(2)      | 1.9243(3) | 1.9233(1) | 1.9208(1) | 1.9167(1)       | 1.9173(1) |
| Ni-O(3) (x2)          | --                            | --             | --             | --        | 1.9287(1)      | --        | 1.9278(1)      | --        | 1.9268(1)      | --         | 1.9253(2)      | 1.9246(3) | 1.9242(1) | 1.9224(1) | 1.9191(1)       | 1.9194(1) |
| Pr/La-O(1) (x1)       | 2.378(2)                      | 2.374(2)       | 2.373(2)       | 2.362(3)  | 2.365(3)       | 2.359(2)  | 2.359(2)       | 2.334(3)  | 2.344(3)       | 2.316(2)   | 2.3388(3)      | 2.335(3)  | 2.3417(2) | 2.3338(2) | 2.315(2)        | 2.305(3)  |
| Pr/La-O(1) (x2, x4) † | 2.7635(3)                     | 2.7624(3)      | 2.7604(3)      | 2.7599(4) | 2.7668(4)      | 2.7592(3) | 2.7672(2)      | 2.7572(4) | 2.7689(4)      | 2.7527(3)  | 2.7683(2)      | 2.7673(5) | 2.7656(2) | 2.7624(2) | 2.7581(2)       | 2.7594(4) |
| Pr/La-O(1) (x2)       | --                            | --             | --             | --        | 2.7540(4)      | --        | 2.7516(2)      | --        | 2.7487(4)      | --         | 2.7445(1)      | 2.7422(5) | 2.7390(2) | 2.7335(2) | 2.7255(2)       | 2.7315(4) |
| Pr/La-O(2) (x2, x4) † | 2.6182(2)                     | 2.6166(2)      | 2.6147(1)      | 2.6149(4) | 2.6131(3)      | 2.6129(8) | 2.6126(3)      | 2.6163(8) | 2.6097(2)      | 2.6220(14) | 2.6070(2)      | 2.6070(2) | 2.6050(2) | 2.6039(2) | 2.5998(2)       | 2.5936(1) |
| Pr/La-O(3) (x2)       | --                            | --             | --             | --        | 2.6132(3)      | --        | 2.6128(3)      | --        | 2.6096(2)      | --         | 2.6068(2)      | 2.6073(2) | 2.6057(2) | 2.6027(2) | 2.5981(2)       | 2.5951(1) |
| Pr/La-O(4) (x2)       | 2.3874(2)                     | 2.3835(1)      | 2.3812(2)      | 2.3785(4) | 2.3801(3)      | 2.3776(7) | 2.3776(2)      | 2.3690(7) | 2.3748(2)      | 2.3582(12) | 2.3714(2)      | 2.3682(2) | 2.3667(2) | 2.3599(2) | 2.3491(2)       | 2.3525(1) |
| Pr/La-O(4) (x2)       | 2.3874(2)                     | 2.3835(1)      | 2.3812(2)      | 2.3785(4) | 2.3802(3)      | 2.3776(7) | 2.3779(2)      | 2.3690(7) | 2.3749(2)      | 2.3582(12) | 2.3716(2)      | 2.3685(2) | 2.3674(2) | 2.3612(2) | 2.3510(2)       | 2.3542(1) |

† Bond multiplicity is x2 for  $F2/m$ , but x4 for  $F4/m\bar{3}m$  and  $Fm\bar{3}m$  models, where O(2) and O(3) sites are equivalent
